# Supplementary material
Source: PubMed Central journal article supplement (PMC8781223)
Supplement: NIHMS1770009-supplement-1.pdf [file NIHMS1770009-supplement-1.pdf]

## Supplementary Tables

Supplementary Table 1. Age at AD diagnosis by Fructan Residual Score Tertiles

|                                             | <b>Low<br/>Fructan<br/>Tertile<br/>(n=125)</b> | <b>Middle<br/>Fructan<br/>Tertile<br/>(n=137)</b> | <b>High<br/>Fructan<br/>Tertile<br/>(n=129)</b> | <b>All<br/>(n=391)</b> | <b>P<br/>Value</b> |
|---------------------------------------------|------------------------------------------------|---------------------------------------------------|-------------------------------------------------|------------------------|--------------------|
| Age at AD diagnosis,<br>mean (SD)           | 83.6 (6.7)                                     | 84.6 (6.4)                                        | 84.6 (6.9)                                      | 84.3 (6.7)             | 0.423              |
| Presence of <i>APOE</i> $\epsilon$ 4 allele |                                                |                                                   |                                                 |                        |                    |
| Yes                                         | 84.2 (7.1)                                     | 84.6 (6.5)                                        | 85.0 (7.1)                                      | 84.6 (6.9)             | 0.740              |
| No                                          | 82.3 (5.4)                                     | 84.6 (6.3)                                        | 83.7 (6.4)                                      | 83.6 (6.1)             | 0.227              |
| Race                                        |                                                |                                                   |                                                 |                        |                    |
| White                                       | 86.4 (7.2)                                     | 88.4 (7.9)                                        | 87.0 (6.8)                                      | 87.2 (7.2)             | 0.741              |
| Black                                       | 83.6 (6.6)                                     | 84.8 (6.8)                                        | 84.4 (7.4)                                      | 84.2 (6.9)             | 0.725              |
| Hispanic                                    | 82.9 (6.5)                                     | 83.8 (5.8)                                        | 84.0 (6.6)                                      | 83.6 (6.3)             | 0.559              |
